# Supplementary material for: Design and Simulation of a Photovoltaic Power Plant for Green Hydrogen Production in Saudi Arabia
Source: Research Square preprint supplement (doi:10.21203/rs.3.rs-7001662/v1), 2025-07-17
Supplement: Supplementary file 1 [file acdb8c0b2d116b3d640a5031.pdf]

# PVsyst - Simulation report

## Grid-Connected System

Project: NEOM

Variant: New simulation variant

No 3D scene defined, no shadings

System power: 4999 kWp

Neom City - Saudi Arabia

**Author**

University of Sheffield (United kingdom)

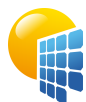

## Project: NEOM

Variant: New simulation variant

### PVsyst V7.4.0

VC0, Simulation date:  
07/26/23 23:33  
with v7.4.0

University of Sheffield (United kingdom)

### Project summary

#### Geographical Site

Neom City  
Saudi Arabia

#### Situation

Latitude 28.33 °N  
Longitude 34.95 °E  
Altitude 147 m  
Time zone UTC+3

#### Project settings

Albedo 0.20

#### Meteo data

Neom City  
Meteonorm 8.1 (1998-2002), Sat=100% - Synthetic

### System summary

#### Grid-Connected System

No 3D scene defined, no shadings

#### PV Field Orientation

Fixed plane  
Tilt/Azimuth 30 / 0 °

#### Near Shadings

No Shadings

#### User's needs

Unlimited load (grid)

#### System information

##### PV Array

Nb. of modules 10203 units  
Pnom total 4999 kWp

##### Inverters

Nb. of units 5 units  
Pnom total 4375 kWac  
Pnom ratio 1.143

### Results summary

Produced Energy 10602177 kWh/year Specific production 2121 kWh/kWp/year Perf. Ratio PR 84.07 %

### Table of contents

|                                                             |   |
|-------------------------------------------------------------|---|
| Project and results summary                                 | 2 |
| General parameters, PV Array Characteristics, System losses | 3 |
| Main results                                                | 4 |
| Loss diagram                                                | 5 |
| Predef. graphs                                              | 6 |
| Single-line diagram                                         | 7 |
| CO <sub>2</sub> Emission Balance                            | 8 |

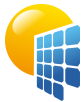

## Project: NEOM

Variant: New simulation variant

### PVsyst V7.4.0

VC0, Simulation date:  
07/26/23 23:33  
with v7.4.0

University of Sheffield (United kingdom)

### General parameters

#### Grid-Connected System

No 3D scene defined, no shadings

#### PV Field Orientation

##### Orientation

Fixed plane

Tilt/Azimuth 30 / 0 °

##### Sheds configuration

No 3D scene defined

##### Models used

Transposition Perez  
Diffuse Perez, Meteonorm  
Circumsolar separate

##### Horizon

Free Horizon

##### Near Shadings

No Shadings

##### User's needs

Unlimited load (grid)

### PV Array Characteristics

#### PV module

Manufacturer

Generic

Model

LR5-66HPH-490M G2

(Original PVsyst database)

Unit Nom. Power

490 Wp

Number of PV modules

10203 units

Nominal (STC)

4999 kWp

Modules

537 Strings x 19 In series

#### At operating cond. (50°C)

Pmpp

4581 kWp

U mpp

650 V

I mpp

7048 A

#### Total PV power

Nominal (STC)

4999 kWp

Total

10203 modules

Module area

24228 m²

Cell area

22428 m²

#### Inverter

Manufacturer

Generic

Model

PVS800-57-0875kW-B

(Original PVsyst database)

Unit Nom. Power

875 kWac

Number of inverters

5 units

Total power

4375 kWac

Operating voltage

525-825 V

Max. power (=>25°C)

1050 kWac

Pnom ratio (DC:AC)

1.14

#### Total inverter power

Total power

4375 kWac

Max. power

5250 kWac

Number of inverters

5 units

Pnom ratio

1.14

### Array losses

#### Thermal Loss factor

Module temperature according to irradiance

Uc (const) 20.0 W/m²K

Uv (wind) 0.0 W/m²K/m/s

#### DC wiring losses

Global array res.

1.5 mΩ

Loss Fraction

1.5 % at STC

#### Module Quality Loss

Loss Fraction

-0.8 %

#### Module mismatch losses

Loss Fraction 2.0 % at MPP

#### Strings Mismatch loss

Loss Fraction

0.2 %

#### IAM loss factor

Incidence effect (IAM): User defined profile

| 0°    | 25°   | 45°   | 60°   | 65°   | 70°   | 75°   | 80°   | 90°   |
|-------|-------|-------|-------|-------|-------|-------|-------|-------|
| 1.000 | 1.000 | 0.995 | 0.962 | 0.936 | 0.903 | 0.851 | 0.754 | 0.000 |



## Main results

## System Production

Produced Energy

10602177 kWh/year

Specific production

2121 kWh/kWp/year

Perf. Ratio PR

84.07 %

## Normalized productions (per installed kWp)

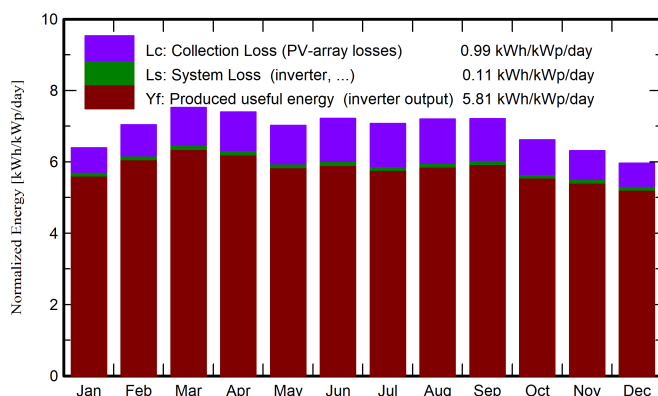

## Performance Ratio PR

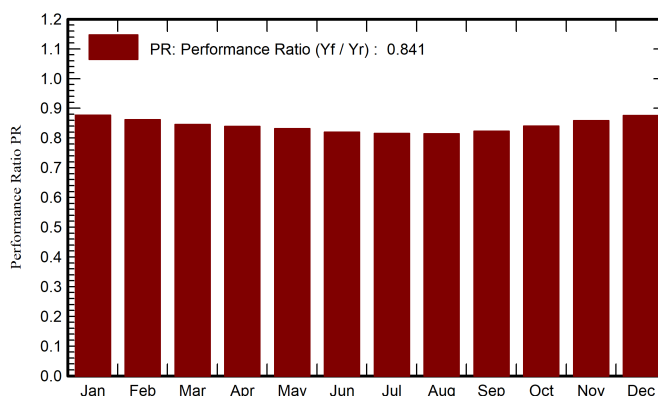

## Balances and main results

|           | GlobHor            | DiffHor            | T_Amb | GlobInc            | GlobEff            | EArray   | E_Grid   | PR    |
|-----------|--------------------|--------------------|-------|--------------------|--------------------|----------|----------|-------|
|           | kWh/m <sup>2</sup> | kWh/m <sup>2</sup> | °C    | kWh/m <sup>2</sup> | kWh/m <sup>2</sup> | kWh      | kWh      | ratio |
| January   | 130.7              | 25.19              | 17.53 | 198.2              | 196.1              | 885876   | 869152   | 0.877 |
| February  | 146.3              | 28.17              | 19.05 | 197.0              | 194.9              | 865252   | 848957   | 0.862 |
| March     | 199.4              | 38.75              | 22.30 | 233.1              | 230.2              | 1004410  | 985098   | 0.845 |
| April     | 216.5              | 54.60              | 25.45 | 221.9              | 218.4              | 948657   | 930486   | 0.839 |
| May       | 236.5              | 68.45              | 29.51 | 217.7              | 213.5              | 923049   | 905660   | 0.832 |
| June      | 249.7              | 47.74              | 31.96 | 216.4              | 211.7              | 903513   | 886663   | 0.820 |
| July      | 246.4              | 57.86              | 33.51 | 219.4              | 214.5              | 911750   | 894840   | 0.816 |
| August    | 227.7              | 59.66              | 33.69 | 223.2              | 219.0              | 925413   | 908186   | 0.814 |
| September | 195.0              | 49.09              | 31.07 | 216.3              | 213.0              | 906891   | 890372   | 0.823 |
| October   | 162.6              | 46.43              | 28.08 | 205.0              | 202.3              | 876984   | 860921   | 0.840 |
| November  | 131.0              | 29.08              | 23.37 | 189.4              | 187.6              | 828508   | 812662   | 0.858 |
| December  | 118.9              | 25.03              | 19.39 | 184.9              | 183.1              | 824644   | 809182   | 0.875 |
| Year      | 2260.6             | 530.06             | 26.28 | 2522.5             | 2484.2             | 10804946 | 10602177 | 0.841 |

## Legends

GlobHor Global horizontal irradiation

DiffHor Horizontal diffuse irradiation

T\_Amb Ambient Temperature

GlobInc Global incident in coll. plane

GlobEff Effective Global, corr. for IAM and shadings

EArray Effective energy at the output of the array

E\_Grid Energy injected into grid

PR Performance Ratio

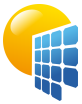

### Loss diagram

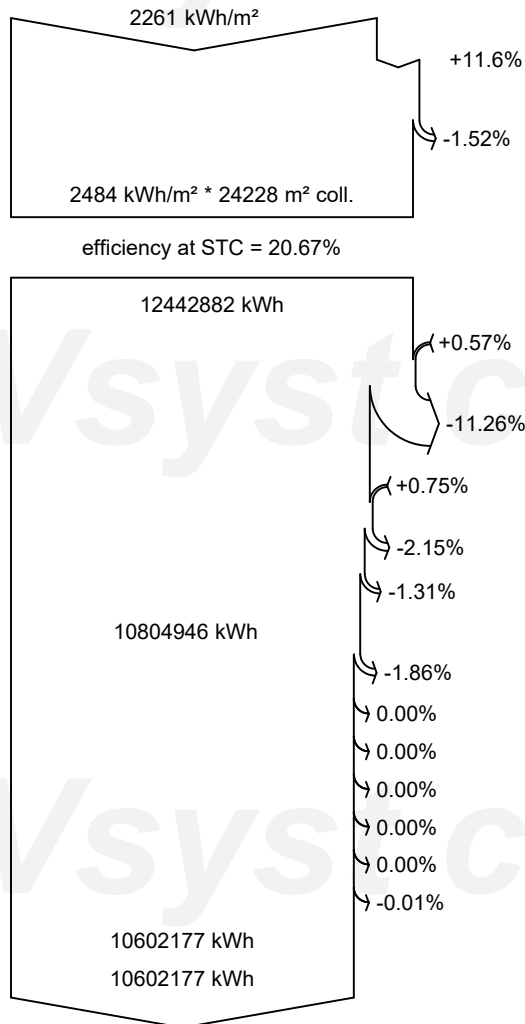

Global horizontal irradiation

Global incident in coll. plane

IAM factor on global

Effective irradiation on collectors

PV conversion

Array nominal energy (at STC effic.)

PV loss due to irradiance level

PV loss due to temperature

Module quality loss

Mismatch loss, modules and strings

Ohmic wiring loss

Array virtual energy at MPP

Inverter Loss during operation (efficiency)

Inverter Loss over nominal inv. power

Inverter Loss due to max. input current

Inverter Loss over nominal inv. voltage

Inverter Loss due to power threshold

Inverter Loss due to voltage threshold

Night consumption

Available Energy at Inverter Output

Energy injected into grid

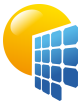

Predef. graphs

Daily Input/Output diagram

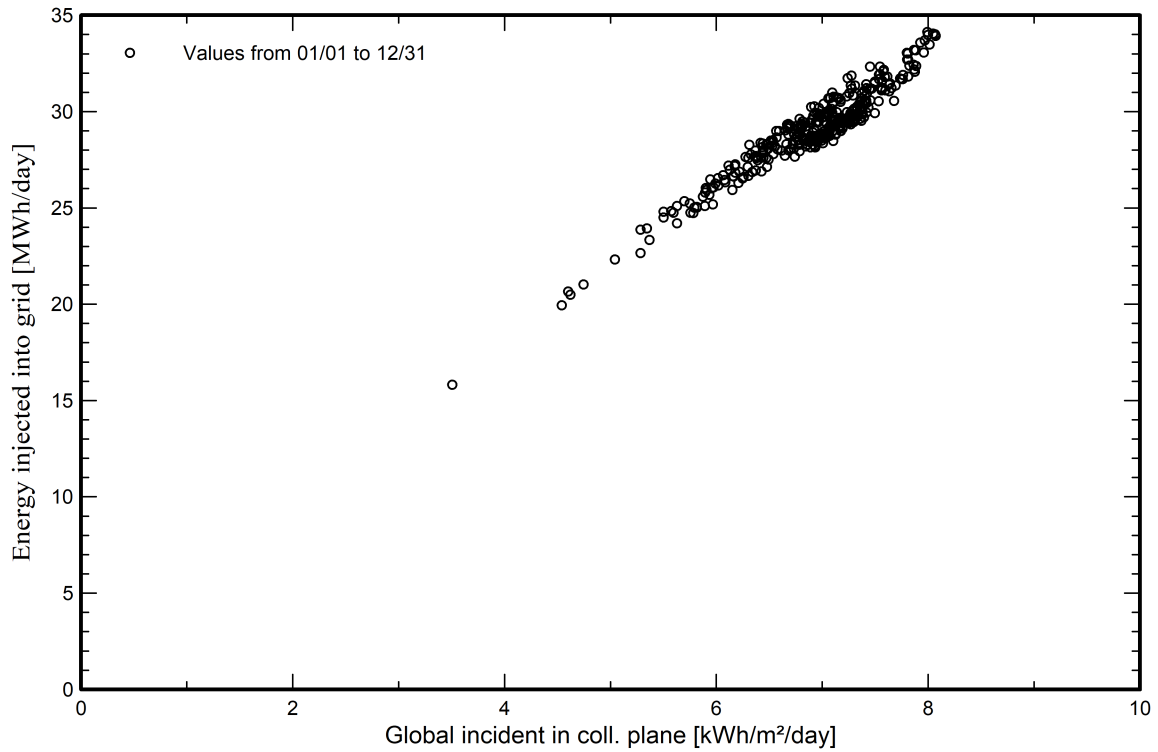

System Output Power Distribution

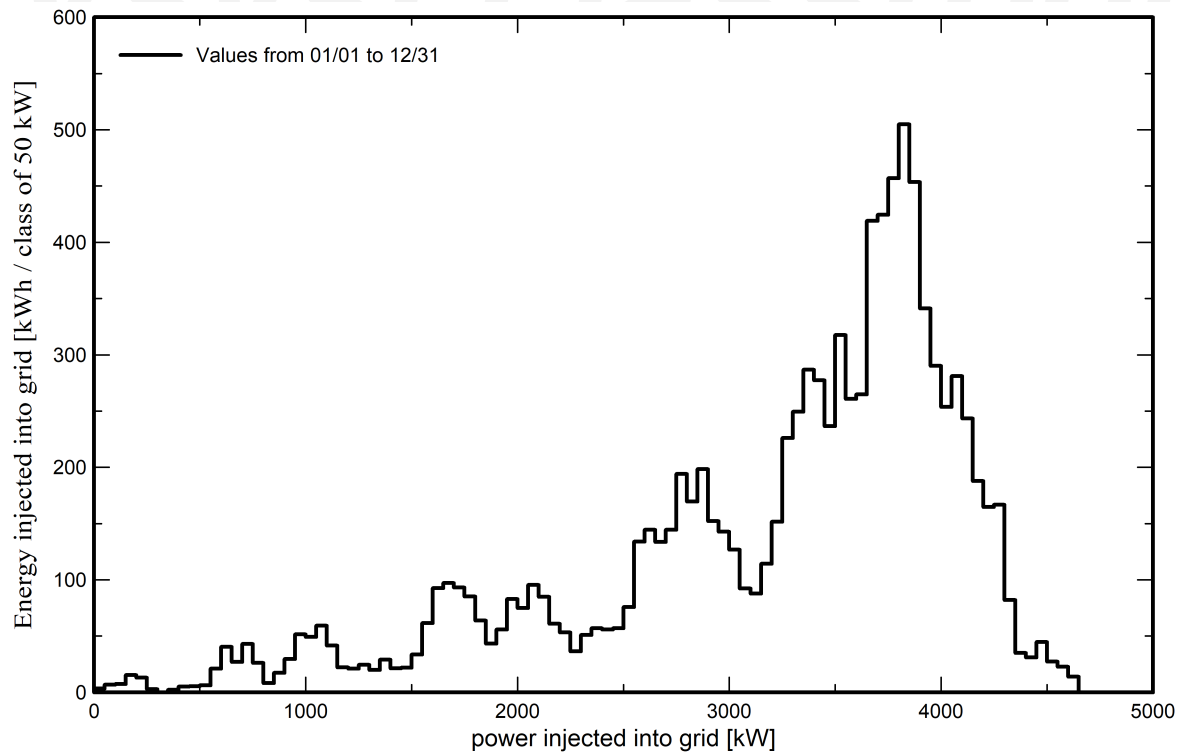

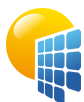

**PVsyst V7.4.0**

VC0, Simulation date:  
07/26/23 23:33  
with v7.4.0

# Single-line diagram

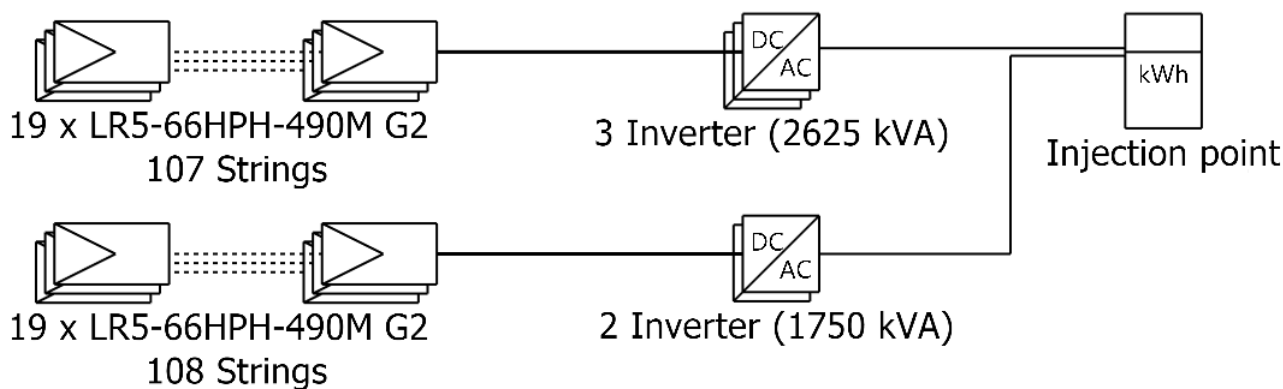

|           |                        |
|-----------|------------------------|
| PV module | LR5-66HPH-490M G2      |
| Inverter  | PVS800-57-0875kW-B     |
| String    | 19 x LR5-66HPH-490M G2 |

NEOM University of Sheffield (United Kingdom)

VC0 : New simulation variant

08/01/23

**CO<sub>2</sub> Emission Balance**Total: 195978.1 tCO<sub>2</sub>**Generated emissions**Total: 9070.79 tCO<sub>2</sub>

Source: Detailed calculation from table below

**Replaced Emissions**Total: 236322.5 tCO<sub>2</sub>

System production: 10602.18 MWh/yr

Grid Lifecycle Emissions: 743 gCO<sub>2</sub>/kWh

Source: IEA List

Country: Saudi Arabia

Lifetime: 30 years

Annual degradation: 1.0 %

**Saved CO<sub>2</sub> Emission vs. Time**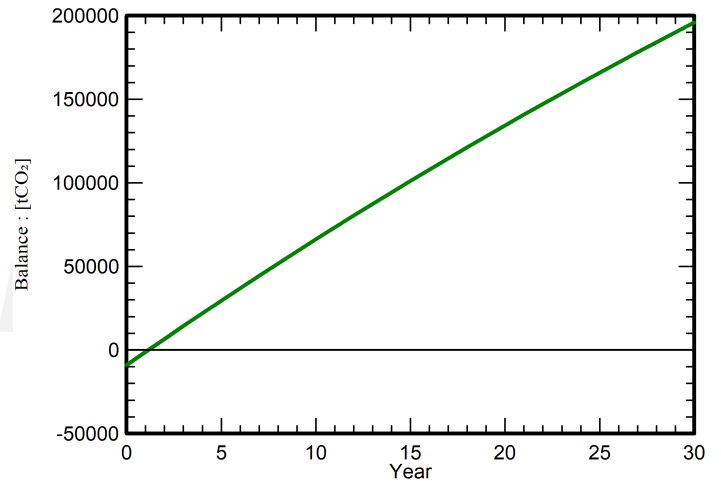**System Lifecycle Emissions Details**

| Item      | LCE                         | Quantity  | Subtotal             |
|-----------|-----------------------------|-----------|----------------------|
|           |                             |           | [kgCO <sub>2</sub> ] |
| Modules   | 1713 kgCO <sub>2</sub> /kWp | 4999 kWp  | 8562692              |
| Supports  | 4.96 kgCO <sub>2</sub> /kg  | 102030 kg | 505641               |
| Inverters | 491 kgCO <sub>2</sub> /     | 5.00      | 2455                 |
